# Supplementary material for: Identification of anti-inflammatory mechanism of action and molecular targets of Hypericum perforatum in the treatment of major depression based on bioinformatics methods and machine learning
Source: Research Square preprint supplement (doi:10.21203/rs.3.rs-2984434/v1), 2023-05-31
Supplement: Supplementary file 2 [file 40905b3cc1d810f6920d348c.xlsx]

## Sheet: Sheet1
Supplementary Table S3: 5 target proteins
gene	uniport_id	pdb	Method	Macromolecule
MYC	P01106	5I4Z	X-RAY DIFFRACTION 1.95 Å	Myc proto-oncogene protein (protein)
HSP90AA1	P07900	1UY6	X-RAY DIFFRACTION 1.9 Å	HEAT SHOCK PROTEIN HSP 90-ALPHA (protein)
AKT1	P31749	1H10	X-RAY DIFFRACTION 1.4 Å	RAC-ALPHA SERINE/THREONINE KINASE (protein)
MAPK1	P28482	2OJG	X-RAY DIFFRACTION 2 Å	Mitogen-activated protein kinase 1 (protein)
EGF	P01133	1JL9	X-RAY DIFFRACTION 3 Å	EPIDERMAL GROWTH FACTOR (protein)
